# Supplementary material for: Determinants of patients choice of health care providers : A scoping review
Source: Springer Nature journal article supplement (doi:10.1186/1472-6963-12-272), 2012-01-01

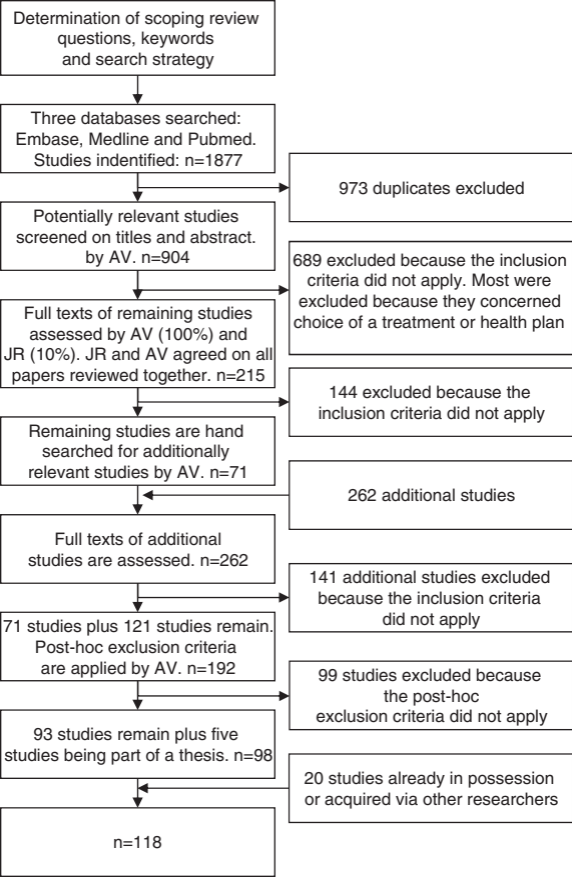

Supplement: 12913_2012_2208_MOESM1_ESM.pdf [file 12913_2012_2208_MOESM1_ESM.pdf]
